# Supplementary material for: Thresholds for post-rebound SHIV control after CCR5 gene-edited autologous hematopoietic cell transplantation
Source: eLife. 2021 Jan 12;10:e57646. doi: 10.7554/eLife.57646 (PMC7803377; doi:10.7554/eLife.57646)
Supplement: Figure 3—source data 2. — Best fit in bold-red (lowest AIC). The AIC values presented for each statistical assumption is the lowest of 10 runs of the SAEM algorithm with different randomly selected initial guesses. [file elife-57646-fig3-data2.docx]

**Figure 3-source data 2.** Competing models for fitting T cell reconstitution with respective AIC values. Best fit in bold-red (lowest AIC). The AIC values presented for each statistical assumption is the lowest of 10 runs of the SAEM algorithm with different randomly selected initial guesses.

| **Model** | **Mechanistic Assumptions** | **Statistical Assumptions** | **ΔAIC** |
| --- | --- | --- | --- |
| 1 | - Full model as in **eq. 2** in main text. - Does not include compartment *Np2* | - All random effects>0. - No correlations among parameters. | 42.4 |
| - All random effects>0. - , - ,. | 24.9 |
| - All random effects>0. - , - ,. - ,. - ,. | 26.8 |
| 2 | - CD4+CCR5+ T cells do not downregulate CCR5 (). - Does not include compartment *Np2* | - All random effects>0. - No correlations among parameters. | 78.4 |
| 3 | - Thymic export rate of naïve CD4+ and CD8+ T cells is the same (). - Does not include compartment *Np2* | - All random effects>0. - No correlations among parameters. | 41.7 |
| - All random effects>0. - , - ,. | 25.9 |
| - All random effects>0. - , - ,. - ,. - ,. | 28.1 |
| 4 | - CD4+CCR5+ T cells do not downregulate CCR5 (). - Thymic export rate of naïve CD4+ and CD8+ T cells is the same () . - Does not include compartment *Np2* | - All random effects>0. - No correlations among parameters. | 69.2 |
| 5 | - CD4+CCR5- T cells are long-lived and do not proliferate (). - Does not include compartment *Np2* | - All random effects>0. - No correlations among parameters. | 45.9 |
| 6 | - CD4+CCR5- T cells are long-lived and do not proliferate (). - CD4+CCR5+ T cells do not downregulate CCR5 (). - Does not include compartment *Np2* | - All random effects>0. - No correlations among parameters. | 70.1 |
| 7 | - CD4+CCR5- T cells are long-lived and do not proliferate (). - Thymic export rate of naïve CD4+ and CD8+ T cells is the same (). - Does not include compartment *Np2* | - All random effects>0. - No correlations among parameters. | 53.5 |
| 8 | - CD4+CCR5- T cells are long-lived and do not proliferate (). - Thymic export rate of naïve CD4+ and CD8+ T cells is the same (). - CD4+CCR5+ T cells do not downregulate CCR5 (). - Does not include compartment *Np2* | - All random effects>0. - No correlations among parameters. | 91.1 |
| 9 | - CD4+CCR5- T cells do not proliferate (). - Does not include compartment *Np2* | - All random effects>0. - No correlations among parameters. | 44.5 |
| - All random effects>0. - , - ,. | 27.3 |
| - All random effects>0. - , - ,. - ,. - ,. | 23.2 |
| 10 | - CD4+CCR5- T cells do not proliferate (). - CD4+CCR5+ T cells do not downregulate CCR5 (). - Does not include compartment *Np2* | - All random effects>0. - No correlations among parameters. | 67.0 |
| 11 | - CD4+CCR5- T cells do not proliferate (). - Thymic export rate of naïve CD4+ and CD8+ T cells is the same (). - Does not include compartment *Np2* | - All random effects>0, - no correlations. | 45.7 |
| - All random effects>0. - , - ,. | 21.2 |
| - All random effects>0. - , - ,. - ,. - ,. | 18.7 |
| - Random effects equal to zero for parameters: , , , , , and - All random effects>0. - , - ,. - ,. - ,. | 2.8 |
| - Random effects equal to zero for parameters: , , , , and - , - ,. - ,. - ,. | **0.0** |
| 12 | - CD4+CCR5- T cells do not proliferate (). - Thymic export rate of naïve CD4+ and CD8+ T cells is the same (). - CD4+CCR5+ T cells do not downregulate CCR5 (). - Does not include compartment *Np2* | - All random effects>0. - No correlations among parameters. | 63.8 |
| 13 | - Full model as in **eq. 2** in main text. - Includes compartment *Np2* | - All random effects>0. - No correlations among parameters. | 42.2 |
| - All random effects>0. - , - ,. | 26.1 |
| - All random effects>0. - , - ,. - ,. - ,. | 30.5 |
| 14 | - CD4+CCR5+ T cells do not downregulate CCR5 (). - Includes compartment *Np2* | - All random effects>0. - No correlations among parameters. | 81.3 |
| 15 | - Thymic export rate of naïve CD4+ and CD8+ T cells is the same (). - Includes compartment *Np2* | - All random effects>0. - No correlations among parameters. | 55.3 |
| - All random effects>0. - , - ,. | 47.1 |
| 16 | - CD4+CCR5+ T cells do not downregulate CCR5 (). - Thymic export rate of naïve CD4+ and CD8+ T cells is the same () . - Includes compartment *Np2* | - All random effects>0. - No correlations among parameters. | 71.7 |
| 17 | - CD4+CCR5- T cells are long-lived and do not proliferate (). - Includes compartment *Np2* | - All random effects>0. - No correlations among parameters. | 44.5 |
| 18 | - CD4+CCR5- T cells are long-lived and do not proliferate (). - CD4+CCR5+ T cells do not downregulate CCR5 (). - Includes compartment *Np2* | - All random effects>0. - No correlations among parameters. | 67.3 |
| 19 | - CD4+CCR5- T cells are long-lived and do not proliferate (). - Thymic export rate of naïve CD4+ and CD8+ T cells is the same (). - Includes compartment *Np2* | - All random effects>0. - No correlations among parameters. | 52.6 |
| 20 | - CD4+CCR5- T cells are long-lived and do not proliferate (). - Thymic export rate of naïve CD4+ and CD8+ T cells is the same (). - CD4+CCR5+ T cells do not downregulate CCR5 (). - Includes compartment *Np2* | - All random effects>0. - No correlations among parameters. | 87.4 |
| 21 | - CD4+CCR5- T cells do not proliferate (). - Includes compartment *Np2* | - All random effects>0. - No correlations among parameters. | 44.4 |
| - All random effects>0. - , - ,. | 18.6 |
| - All random effects>0. - , - ,. - ,. - ,. | 15.0 |
| 22 | - CD4+CCR5- T cells do not proliferate (). - CD4+CCR5+ T cells do not downregulate CCR5 (). - Includes compartment *Np2* | - All random effects>0. - No correlations among parameters. | 68.0 |
| 23 | - CD4+CCR5- T cells do not proliferate (). - Thymic export rate of naïve CD4+ and CD8+ T cells is the same (). - Includes compartment *Np2* | - All random effects>0, - no correlations. | 44.3 |
| - All random effects>0. - , - ,. | 21.3 |
| - All random effects>0. - , - ,. - ,. - ,. | 18.5 |
| - Random effects equal to zero for parameters: , , , , , and - All random effects>0. - , - ,. - ,. - ,. | 2.2 |
| - Random effects equal to zero for parameters: , , , , and - , - ,. - ,. - ,. | **0.2** |
| 24 | - CD4+CCR5- T cells do not proliferate (). - Thymic export rate of naïve CD4+ and CD8+ T cells is the same (). - CD4+CCR5+ T cells do not downregulate CCR5 (). - Includes compartment *Np2* | - All random effects>0. - No correlations among parameters. | 64.2 |
