# Supplementary material for: Thresholds for post-rebound SHIV control after CCR5 gene-edited autologous hematopoietic cell transplantation
Source: eLife. 2021 Jan 12;10:e57646. doi: 10.7554/eLife.57646 (PMC7803377; doi:10.7554/eLife.57646)
Supplement: Figure 5—source data 2. — RSE: relative standard error. Empty fields represent cases when the standard deviation of random effects, σψ, was fixed to zero. Values of ψ¯ for β,ω4,ω8, and I50 shown here are transformed assuming a blood volume of 3 × 105 μL (calculated assuming blood:weight ratio of 60 mL/kg and body weight of 5 kg). Red values represent an RSE greater than 100% implying that the number of data points may not be enough to estimate the respective parameter. [file elife-57646-fig5-data2.docx]

**Figure 5-source data 2.** Population parameter estimates for the fits of the model with lowest AIC in **Figure 5-source data 1** to the T cell and virus dynamics. RSE: relative standard error. Empty fields represent cases when the standard deviation of random effects, , was fixed to zero. Values of for and shown here are transformed assuming a blood volume of 3×105 μL (calculated assuming blood:weight ratio of 60mL/Kg and body weight of 5Kg). Red values represent an RSE greater than 100% implying that the number of data points may not be enough to estimate the respective parameter.

| **Parameter** |  |  | **%RSE for:** | |
| --- | --- | --- | --- | --- |
|  |  |
|  | 3.2 | 0.2 | 1 |  |
|  | 500 |
|  | 223 |
|  | -3.9 | 0.4 | 38 | 15 |
|  | 5.3 | 0.5 | 2 |  |
|  | -2.2 | 0.4 | 1 | 22 |
|  | -2.9 | 0.7 | 1.8 | 19 |
|  | 0.8 | 21 | 23 |
|  | 0.2 | 0.7 | 3 | 22 |
|  | 0.6 | 29 | 34 |
|  | 0.005 | 0.6 | 15 | 25 |
|  | 1.9 | 20 | 20 |
|  | 4.7 | 1 | 40 |  |
|  | 62 |
|  | 30 |
|  | 0.5 | 0.1 | 4 | 21 |
|  | 1.14 | 0.1 | 4 | 21 |
|  | **Parameter value** | | **%RSE** | |
|  | 0.6 | | 22 | |
|  | 0.6 | | 25 | |
| **,** | -0.96 | | 16 | |
| **,** | 0.55 | | 41 | |
|  | -0.77 | | 14 | |
| **,** | -0.82 | | 8 | |
| **,** | -0.92 | | 6 | |
|  | 0.2 | | 2 | |
|  | 0.16 | | 2 | |
|  | 0.14 | | 1.8 | |
|  | 0.19 | | 1.8 | |
|  | 0.5 | | 2.6 | |
|  | 0.18 | | 9.4 | |
|  | 0.3 | | 9.6 | |
